# Supplementary material
Source: PubMed Central journal article supplement (PMC2898376)

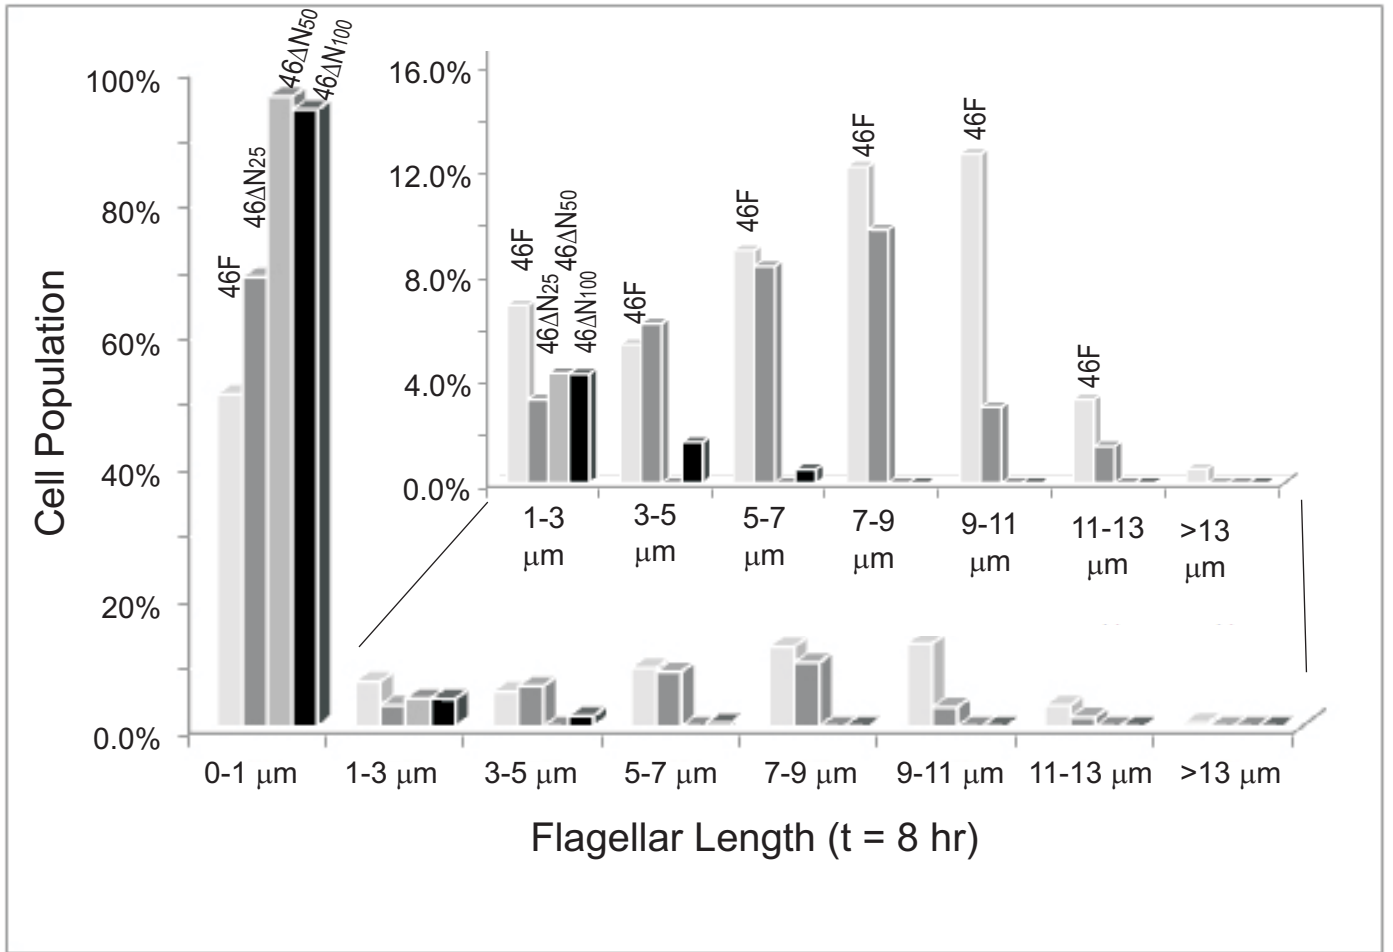

Supplemental Fig 1. Lucker *et al.*

Supplement: supp_M110.106997_jbc.M110.106997-1.pdf [file supp_M110.106997_jbc.M110.106997-1.pdf]

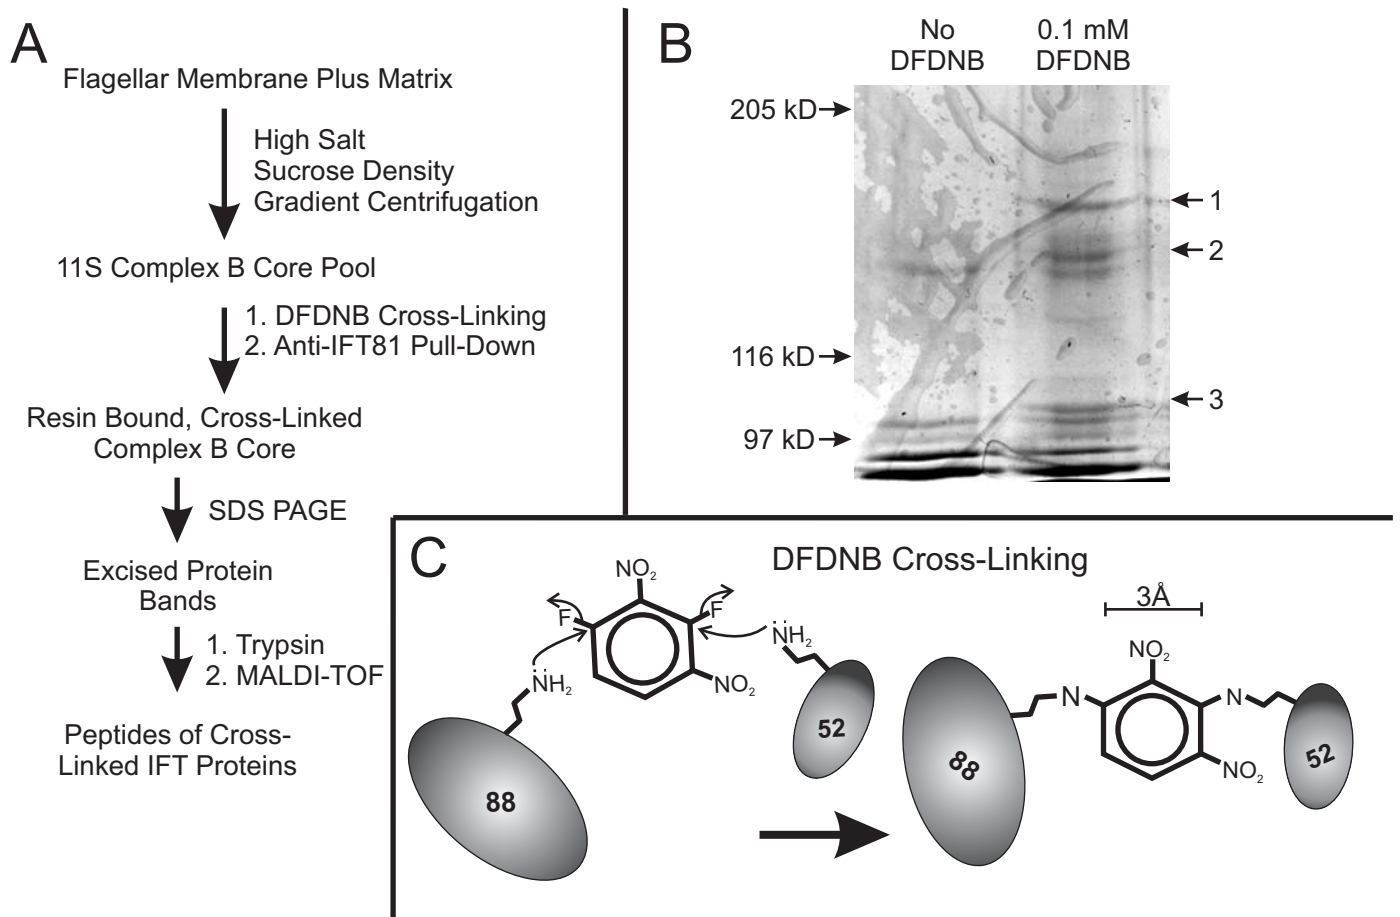

Supplemental Fig. 2, Lucker *et al.*

Supplement: supp_M110.106997_jbc.M110.106997-2.pdf [file supp_M110.106997_jbc.M110.106997-2.pdf]
